# Supplementary material for: The sensing mechanism of a flavone-based ESIPT fluorescent chemodosimeter for selective recognition towards fluoride: a theoretical
Source: Royal Society of Chemistry journal article supplement (doi:10.1039/d1ra06431b), 2022-01-01
Supplement: d1ra06431b1.pdf [file d1ra06431b1.pdf]

**Supplementary Information for**

**The sensing mechanism of a flavone-based ESIPT**

**fluorescent chemodosimeter for selective recognition**

**towards fluoride: A theoretical**

**study**

Ran Wei, Lifeng Jia\*, Xueli JIA, Hongsheng Zhai\*

Ran Wei, Lifeng Jia (✉), Hongsheng Zhai (✉)

Henan Key Laboratory of Infrared Materials & Spectrum Measures and Applications,  
School of Physics, Henan Normal University

Xinxiang, Henan 453007, PR China

Email: [jialf1984@163.com](mailto:jialf1984@163.com), [hszhai@htu.cn](mailto:hszhai@htu.cn) Fax: +86 373 3329297

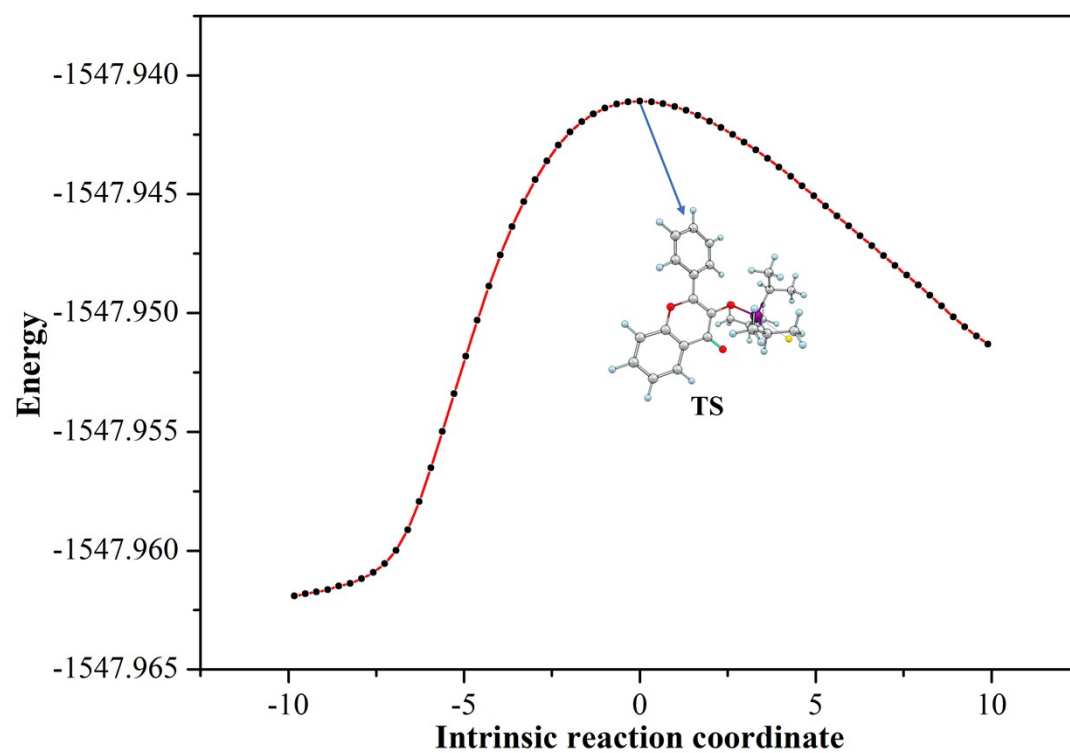

**Fig. S1.** Energy changes along intrinsic reaction coordinate. TS: transition state.
